# Supplementary material
Source: PubMed Central journal article supplement (PMC4729652)
Supplement: NIHMS738291-supplement-Suppl_table.pdf [file NIHMS738291-supplement-Suppl_table.pdf]

## Supplementary Information

**Supplementary Table 1. Allele and genotype frequencies of the nine variants genotyped in both the discovery and the replication cohorts.** In the replication cohort, DNA was insufficient to genotype the nine variants in all patients; therefore, the number of genotyped patients varies by variant. HWE=Hardy Weinberg Equilibrium; MAF=minor allele frequency

|                   |                           |                               | Discovery Cohort (n=67) |      |      | Replication Cohort (n=74-104) |      |      |
|-------------------|---------------------------|-------------------------------|-------------------------|------|------|-------------------------------|------|------|
| Gene              | Variant (rs#)             | Function                      | N (%)                   | MAF  | HWE  | N (%)                         | MAF  | HWE  |
| <b>ABCB1</b>      | IVS9 -44 A>G (rs10276036) | Intronic                      |                         | 0.46 | 0.01 | 77                            | 0.35 | 0.82 |
| AA                |                           |                               | 25 (37)                 |      |      | 32 (41)                       |      |      |
| AG                |                           |                               | 23 (34)                 |      |      | 36 (47)                       |      |      |
| GG                |                           |                               | 19 (28)                 |      |      | 9 (12)                        |      |      |
| <b>ABCC1</b>      | IVS11 -48 C>T (rs3765129) | Intronic                      |                         | 0.17 | 0.08 | 74                            | 0.17 | 0.08 |
| CC                |                           |                               | 48 (72)                 |      |      | 49 (66)                       |      |      |
| CT                |                           |                               | 15 (22)                 |      |      | 25 (34)                       |      |      |
| TT                |                           |                               | 4 (6)                   |      |      | 0 (0)                         |      |      |
| <b>ABCC1</b>      | 1684 T>C (rs35605)        | Synonymous, Exon 13           |                         | 0.23 | 0.78 | 95                            | 0.22 | 0.03 |
| TT                |                           |                               | 40 (60)                 |      |      | 54 (57)                       |      |      |
| TC                |                           |                               | 23 (34)                 |      |      | 40 (42)                       |      |      |
| CC                |                           |                               | 4 (6)                   |      |      | 1 (1)                         |      |      |
| <b>ABCC2</b>      | -24 C>T (rs717620)        | 5' UTR                        |                         | 0.18 | 0.34 | 94                            | 0.17 | 0.21 |
| CC                |                           |                               | 44 (66)                 |      |      | 63 (67)                       |      |      |
| CT                |                           |                               | 22 (33)                 |      |      | 30 (32)                       |      |      |
| TT                |                           |                               | 1 (1)                   |      |      | 1 (1)                         |      |      |
| <b>ABCC2</b>      | 3972C>T (rs3740066)       | Synonymous, Exon 28           |                         | 0.34 | 0.81 | 104                           | 0.36 | 0.84 |
| CC                |                           |                               | 30 (45)                 |      |      | 43 (41)                       |      |      |
| CT                |                           |                               | 29 (43)                 |      |      | 47 (45)                       |      |      |
| TT                |                           |                               | 8 (12)                  |      |      | 14 (14)                       |      |      |
| <b>SLCO1B1*1b</b> | 388 A>G (rs2306283)       | Nonsynonymous, Exon 5 (N130D) |                         | 0.46 | 0.58 | 84                            | 0.40 | 0.73 |
| AA                |                           |                               | 21 (31)                 |      |      | 29 (35)                       |      |      |
| AG                |                           |                               | 31 (46)                 |      |      | 42 (50)                       |      |      |
| GG                |                           |                               | 15 (22)                 |      |      | 13 (15)                       |      |      |
| <b>SLCO1B1*5</b>  | 521 T>C (rs4149056)       | Nonsynonymous, Exon 6 (V174A) |                         | 0.19 | 0.79 | 83                            | 0.13 | 0.74 |
| TT                |                           |                               | 44 (66)                 |      |      | 63 (76)                       |      |      |
| TC                |                           |                               | 21 (31)                 |      |      | 19 (23)                       |      |      |
| CC                |                           |                               | 2 (3)                   |      |      | 1 (1)                         |      |      |
| <b>UGT1A1*93</b>  | -3156 G>A (rs10929302)    | Intronic                      |                         | 0.32 | 0.24 | 103                           | 0.28 | 0.57 |
| GG                |                           |                               | 33 (49)                 |      |      | 52 (50)                       |      |      |
| GA                |                           |                               | 25 (37)                 |      |      | 44 (43)                       |      |      |
| AA                |                           |                               | 9 (13)                  |      |      | 7 (7)                         |      |      |
| <b>UGT1A1*28</b>  | TA6>TA7 (rs8175347)       | TA repeat, Promoter           |                         | 0.34 | 0.25 | 75                            | 0.33 | 0.11 |
| *1/*1             |                           |                               | 31 (46)                 |      |      | 31 (41)                       |      |      |
| *1/*28            |                           |                               | 26 (39)                 |      |      | 39 (52)                       |      |      |
| *28/*28           |                           |                               | 10 (15)                 |      |      | 5 (7)                         |      |      |
